# Supplementary material
Source: PubMed Central journal article supplement (PMC2949407)
Supplement: supp_182_6_826__1.pdf [file supp_182_6_826__1.pdf]

# **Sleep Disordered Breathing and Pro-thrombotic Biomarkers:**

## **Cross-Sectional Results of the Cleveland Family Study**

Reena Mehra MD MS, Fang Xu MS, Denise C. Babineau PhD,

Russell P. Tracy PhD, Nancy S. Jenny PhD,

Sanjay R. Patel MD MS, Susan Redline MD MPH

**Online Data Supplement**

## On-Line Supplement.

Figure 1.

### Cohort Exclusion Criteria

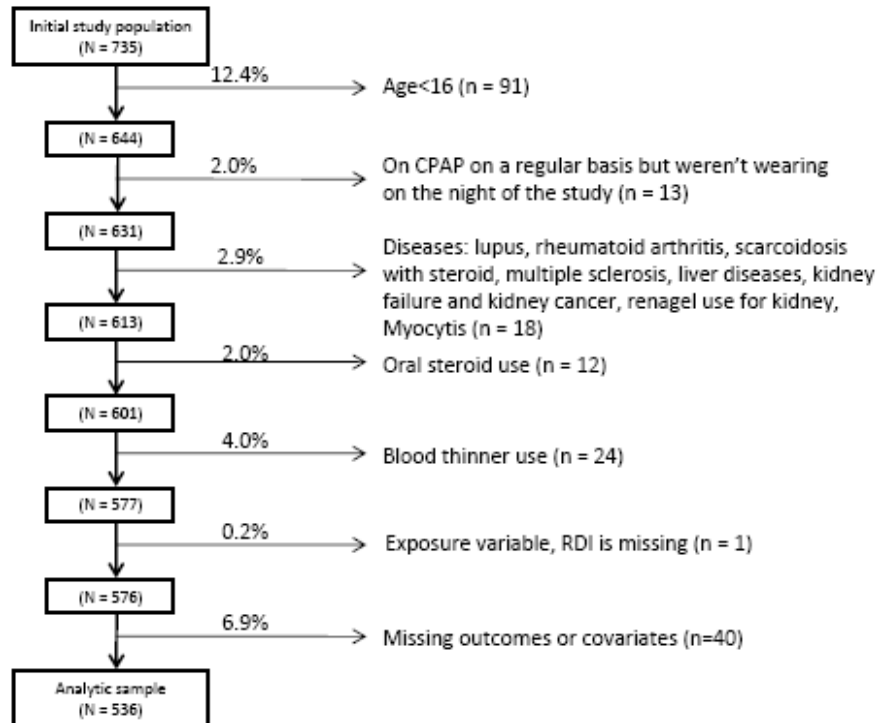

**Table 1A: Estimated change in PAI-1 when AHI is modeled using a piecewise linear association from a sample excluding cardiovascular diseases (n = 475)**

|                                     | Estimated relative mean change in PAI-1 given a 5 unit increase in AHI (95% CI) | Test if no relative mean change in PAI-1 given a 5 unit increase in AHI | Test if relative mean change in PAI-1 is the same for both AHI groups |
|-------------------------------------|---------------------------------------------------------------------------------|-------------------------------------------------------------------------|-----------------------------------------------------------------------|
| <b>PAI-1 AM (ng/mL)<sup>a</sup></b> |                                                                                 |                                                                         |                                                                       |
| <b>Model 1</b>                      |                                                                                 |                                                                         |                                                                       |
| AHI < 15                            | 1.25 (1.16, 1.35) <sup>b</sup>                                                  | < 0.001                                                                 | < 0.001                                                               |
| AHI ≥ 15                            | 1.01 (0.99, 1.04)                                                               | 0.42                                                                    |                                                                       |
| <b>Model 2</b>                      |                                                                                 |                                                                         |                                                                       |
| AHI < 15                            | 1.09 (1.01, 1.17)                                                               | 0.03                                                                    | 0.04                                                                  |
| AHI ≥ 15                            | 0.99 (0.97, 1.02)                                                               | 0.51                                                                    |                                                                       |
| <b>Model 3</b>                      |                                                                                 |                                                                         |                                                                       |
| AHI < 15                            | 1.08 (1.01, 1.16)                                                               | 0.03                                                                    | 0.04                                                                  |
| AHI ≥ 15                            | 0.99 (0.97, 1.02)                                                               | 0.51                                                                    |                                                                       |
| <b>PAI-1 PM (ng/mL)<sup>a</sup></b> |                                                                                 |                                                                         |                                                                       |
| <b>Model 1</b>                      |                                                                                 |                                                                         |                                                                       |
| AHI < 15                            | 1.23 (1.13, 1.35)                                                               | < 0.001                                                                 | < 0.001                                                               |
| AHI ≥ 15                            | 1.01 (0.98, 1.04)                                                               | 0.52                                                                    |                                                                       |
| <b>Model 2</b>                      |                                                                                 |                                                                         |                                                                       |
| AHI < 15                            | 1.08 (0.99, 1.18)                                                               | 0.08                                                                    | 0.08                                                                  |
| AHI ≥ 15                            | 0.99 (0.96, 1.02)                                                               | 0.36                                                                    |                                                                       |

Model 1: AHI + age, race, gender

Model 2: Model 1 + Body Mass Index, Hypertension, Diabetes, Aspirin, Oral Contraceptive, Smoking Status and Menopausal Status

Model 3: Model 2 + PAI-1 PM

a: PAI-1 AM and PAI-1 PM are log transformed to achieve normality in the model. They are back transformed in the parameter estimate

b: For AHI < 15, when AHI increases by 5 units, mean PAI-1 AM increases by 26% 1.25 ng/mL (95% CI: (1.16, 1.35)) adjusting for age, race, and gender.

**Table 1B: Estimated change in PAI-1 when AHI is modeled using a piecewise linear association from a sample excluding hypertension (n = 342)**

|                                     | Estimated relative mean change in PAI-1 given a 5 unit increase in AHI (95% CI) | Test if no relative mean change in PAI-1 given a 5 unit increase in AHI | Test if relative mean change in PAI-1 is the same for both AHI groups |
|-------------------------------------|---------------------------------------------------------------------------------|-------------------------------------------------------------------------|-----------------------------------------------------------------------|
| <b>PAI-1 AM (ng/mL)<sup>a</sup></b> |                                                                                 |                                                                         |                                                                       |
| <b>Model 1</b>                      |                                                                                 |                                                                         |                                                                       |
| AHI < 15                            | 1.41 (1.29, 1.54) <sup>b</sup>                                                  | < 0.001                                                                 | < 0.001                                                               |
| AHI ≥ 15                            | 1.01 (0.98, 1.05)                                                               | 0.46                                                                    |                                                                       |
| <b>Model 2</b>                      |                                                                                 |                                                                         |                                                                       |
| AHI < 15                            | 1.19 (1.09, 1.30)                                                               | < 0.001                                                                 | < 0.001                                                               |
| AHI ≥ 15                            | 0.98 (0.95, 1.01)                                                               | 0.29                                                                    |                                                                       |
| <b>Model 3</b>                      |                                                                                 |                                                                         |                                                                       |
| AHI < 15                            | 1.16 (1.06, 1.26)                                                               | < 0.001                                                                 | 0.002                                                                 |
| AHI ≥ 15                            | 0.98 (0.94, 1.01)                                                               | 0.21                                                                    |                                                                       |
| <b>PAI-1 PM (ng/mL)<sup>a</sup></b> |                                                                                 |                                                                         |                                                                       |
| <b>Model 1</b>                      |                                                                                 |                                                                         |                                                                       |
| AHI < 15                            | 1.37 (1.24, 1.53)                                                               | < 0.001                                                                 | < 0.001                                                               |
| AHI ≥ 15                            | 1.02 (0.97, 1.03)                                                               | 0.51                                                                    |                                                                       |
| <b>Model 2</b>                      |                                                                                 |                                                                         |                                                                       |
| AHI < 15                            | 1.17 (1.06, 1.28)                                                               | 0.002                                                                   | 0.01                                                                  |
| AHI ≥ 15                            | 0.99 (0.95, 1.03)                                                               | 0.63                                                                    |                                                                       |

Model 1: AHI + age, race, gender

Model 2: Model 1 + Body Mass Index, Cardiac/Cerebrovascular Disease, Diabetes, Aspirin, Oral Contraceptive, Smoking Status and Menopausal Status

Model 3: Model 2 + PAI-1 PM

a: PAI-1 AM and PAI-1 PM are log transformed to achieve normality in the model. They are back transformed in the parameter estimate

b: For AHI < 15, when AHI increases by 5 units, mean PAI-1 AM increases by 26% 1.41 ng/mL (95% CI: (1.29, 1.54)) adjusting for age, race, and gender.

**Table 2A: Estimated change in Fibrinogen AM when AHI is modeled using a piecewise linear association from a sample excluding cardiac/cerebrovascular disease (n = 475)**

|                    | Estimated mean (mg/dL) change in Fibrinogen given a 5 unit increase in AHI (95% CI) | Test if no mean change in Fibrinogen given a 5 unit increase in AHI | Test if mean change in Fibrinogen is the same for both AHI groups |
|--------------------|-------------------------------------------------------------------------------------|---------------------------------------------------------------------|-------------------------------------------------------------------|
| <b>Model 1</b>     |                                                                                     |                                                                     |                                                                   |
| <b>AHI &lt; 15</b> | 13.86 (8.00, 19.71) <sup>a</sup>                                                    | < 0.001                                                             | < 0.001                                                           |
| <b>AHI ≥ 15</b>    | 0.76 (-2.02, 3.55)                                                                  | 0.59                                                                |                                                                   |
| <b>Model 2</b>     |                                                                                     |                                                                     |                                                                   |
| <b>AHI &lt; 15</b> | 7.33 (1.91, 12.75)                                                                  | 0.01                                                                | 0.02                                                              |
| <b>AHI ≥ 15</b>    | -0.95 (-3.45, 1.55)                                                                 | 0.46                                                                |                                                                   |

Model 1: AHI + age, race, gender

Model 2: Model 1 + Body Mass Index, Hypertension, Diabetes, Aspirin, Oral Contraceptive, Smoking Status and Menopausal Status

a: For AHI < 15, when AHI increases by 5 units, mean Fibrinogen AM increases by 13.86 mg/dL (95% CI: (8.00, 19.71)) adjusting for age, race, and gender.

**Table 2B: Estimated change in Fibrinogen AM when AHI is modeled using a piecewise linear association from a sample excluding hypertension (n = 342)**

|                    | Estimated mean (mg/dL) change in Fibrinogen given a 5 unit increase in AHI (95% CI) | Test if no mean change in Fibrinogen given a 5 unit increase in AHI | Test if mean change in Fibrinogen is the same for both AHI groups |
|--------------------|-------------------------------------------------------------------------------------|---------------------------------------------------------------------|-------------------------------------------------------------------|
| <b>Model 1</b>     |                                                                                     |                                                                     |                                                                   |
| <b>AHI &lt; 15</b> | 15.96 (9.33, 22.60) <sup>a</sup>                                                    | < 0.001                                                             | 0.001                                                             |
| <b>AHI ≥ 15</b>    | 2.54 (-0.13, 5.22)                                                                  | 0.06                                                                |                                                                   |
| <b>Model 2</b>     |                                                                                     |                                                                     |                                                                   |
| <b>AHI &lt; 15</b> | 8.22 (1.81, 14.62)                                                                  | 0.01                                                                | 0.04                                                              |
| <b>AHI ≥ 15</b>    | 0.56 (-1.42, 2.75)                                                                  | 0.61                                                                |                                                                   |

Model 1: AHI + age, race, gender

Model 2: Model 1 + Body Mass Index, Cardiac/Cerebrovascular Disease, Diabetes, Aspirin, Oral Contraceptive, Smoking Status and Menopausal Status

a: For AHI < 15, when AHI increases by 5 units, mean Fibrinogen AM increases by 15.96 mg/dL (95% CI: (9.33, 22.60)) adjusting for age, race, and gender.
